# Supplementary material for: A graphene-Ag based near-infrared defined accurate anti-scarring strategy for ocular glaucoma surgery
Source: Royal Society of Chemistry journal article supplement (doi:10.1039/d1bm01614h), 2022-01-01
Supplement: d1bm01614h1.pdf [file d1bm01614h1.pdf]

## Supporting Information

### Graphene-Ag Based Near-Infrared Defined Accurate Anti-Scarring Strategy for Ocular Glaucoma Surgery

Yanan Wang<sup>a</sup>, Zikang Xu<sup>b</sup>, Wenchi Li<sup>b</sup>, Wei Wei<sup>a</sup>, Mengqi Qin<sup>a</sup>, Qun Li<sup>b</sup>, Xuexia Liu<sup>b,c\*</sup>,  
Xu Zhang<sup>a\*</sup>, Xiaolei Wang<sup>b,c\*</sup>

<sup>a</sup> Jiangxi Provincial Key Laboratory for Ophthalmology, Jiangxi Research Institute of Ophthalmology and Visual Science, Affiliated Eye Hospital of Nanchang University, Nanchang, Jiangxi, 330006 (P.R. China)

<sup>b</sup> National Engineering Research Center for Bioengineering Drugs and the Technologies, Institute of Translational Medicine, Nanchang University, Nanchang, Jiangxi, 330088 (P.R. China)

<sup>c</sup> College of Chemistry, Nanchang University, Nanchang, Jiangxi, 330088 (P.R. China)

\*Corresponding authors.

\* E-mail: lxxedu2015@163.com Tel: 0791-83827416.

\* E-mail: xuzhang19@163.com Tel: 0791-83827416.

\* E-mail: wangxiaolei@ncu.edu.cn Tel: 0791-83827416.

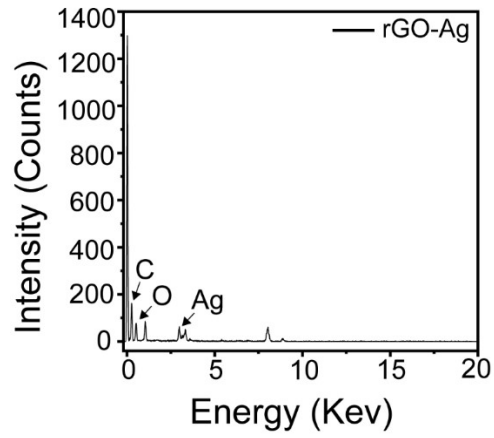

**Figure S1.** EDS spectrum of rGO-Ag.

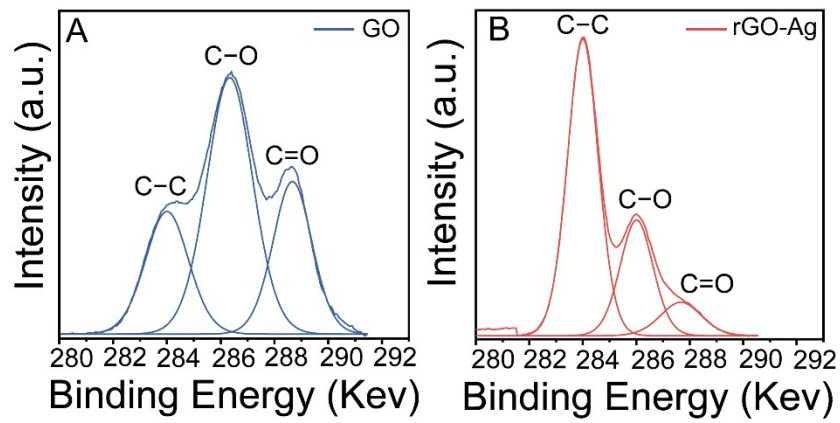

**Figure S2.** A) C 1s XPS spectra of GO and B) rGO-Ag.

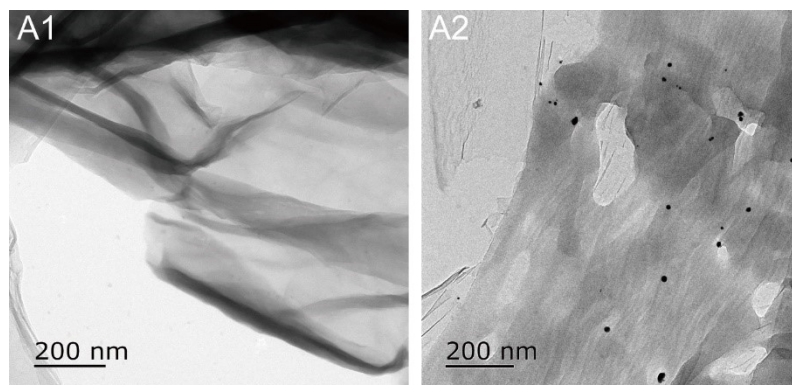

**Figure S3.** A1) Original TEM images of GO and A2) rGO-Ag as referred to Figure 2D.

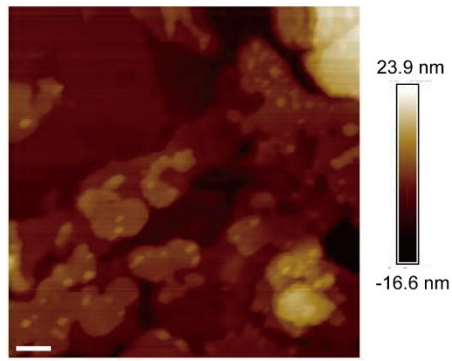

**Figure S4.** AFM image of rGO-Ag. Scale bar = 60 nm.

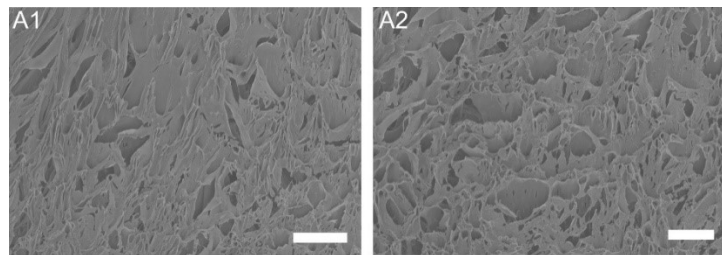

**Figure S5.** A1) SEM images of PVA and A2) PVA@rGO-Ag/5-Fu. Scale bar = 20 nm.

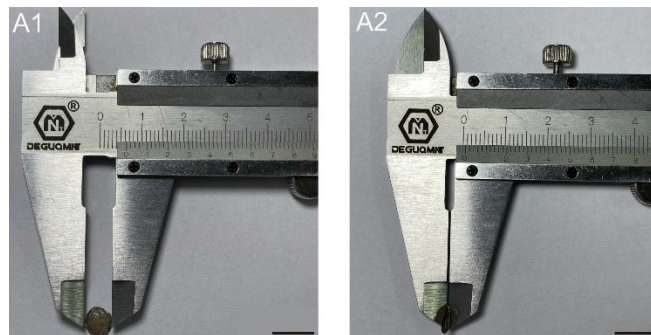

**Figure S6.** The diameter(A) and thickness(B) of PVA@rGO-Ag/5-Fu hydrogel. Scale bar = 1 cm.

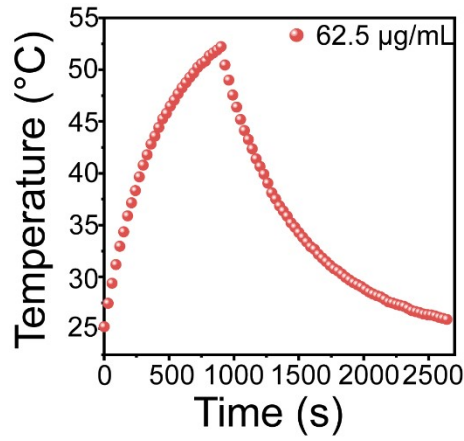

**Figure S7.** The thermal curve of 62.5 µg/mL rGO-Ag exposed to 808 nm NIR (2 W/cm<sup>2</sup>).

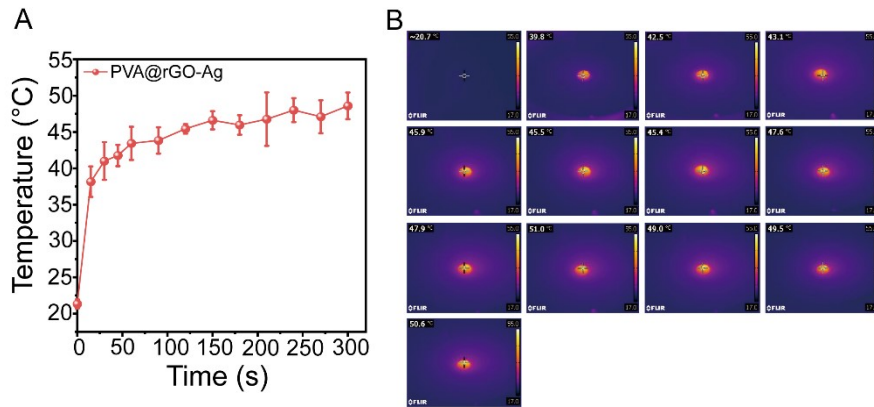

**Figure S8.** A) The thermal curve of PVA@rGO-Ag exposed to 808 nm NIR (2 W/cm<sup>2</sup>) and B) the corresponding digital photographs. Data are means  $\pm$  SD (n = 3).

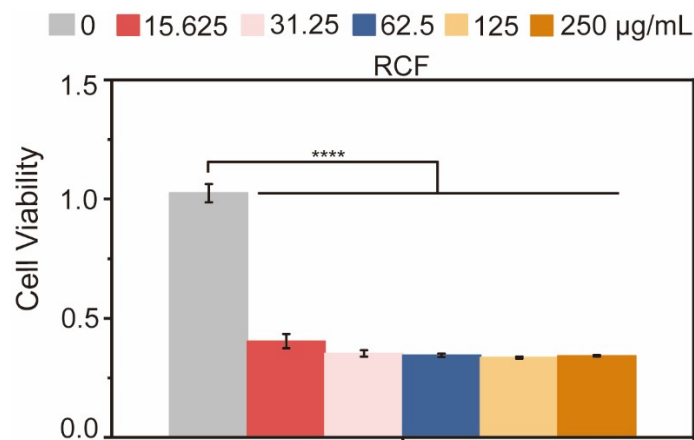

**Figure S9.** Cell viability of RCF cultured with different concentrations of rGO-Ag. Data are means  $\pm$  SD (n = 3). \*\*\*\**P* < 0.0001.

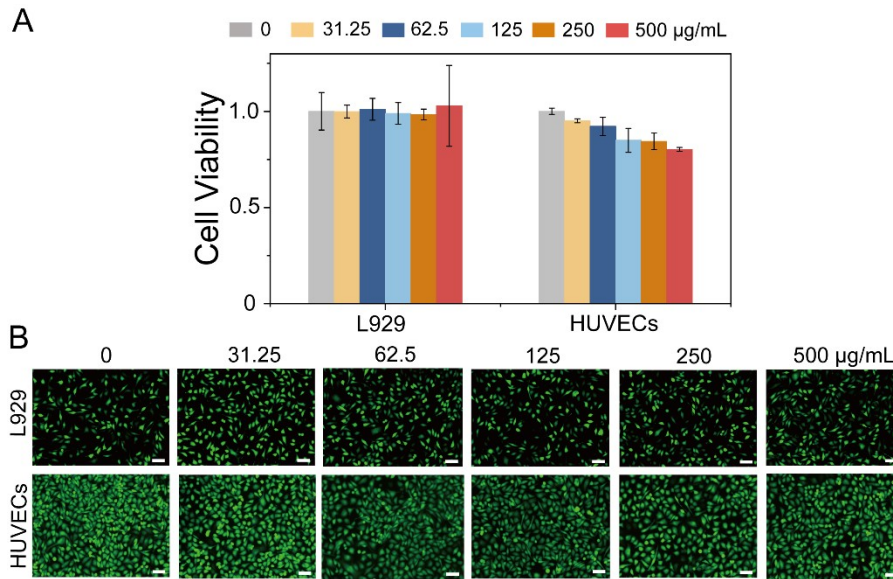

**Figure S10.** A, B) Cell viability and calcein-AM/PI staining of L929 and HUVECs treated with different concentrations of PVA@rGO-Ag for 24 h. Scale bar = 50  $\mu\text{m}$ . Data are means  $\pm$  SD ( $n = 3$ ).

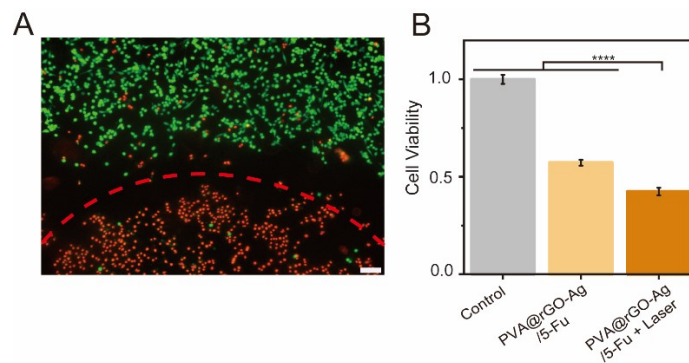

**Figure S11.** A) The region-selective killing effect of PVA@rGO-Ag/5-Fu under NIR irradiation. B) Cell viability of RCF treated with PBS (Control), PVA@rGO-Ag/5-Fu, and PVA@rGO-Ag/5-Fu + Laser. The NIR light was 808 nm and 2  $\text{W}/\text{cm}^2$  for 5 min. Data are means  $\pm$  SD ( $n = 3$ ). \*\*\*\* $P < 0.0001$ .

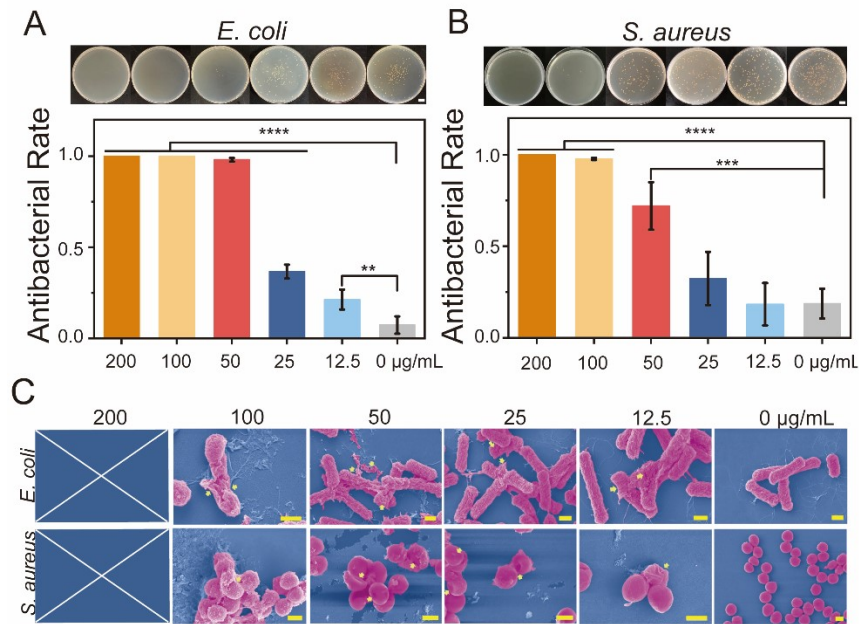

**Figure S12.** A, B) Antibacterial properties of various concentrations of rGO-Ag against *E. coli* and *S. aureus*, respectively. Scale bar = 1 cm. C) The corresponding SEM images of *E. coli* and *S. aureus* treated with rGO-Ag. The cross represented that no bacteria was found. And yellow arrows represented the damaged bacteria. Scale bar = 500 nm. Data are means  $\pm$  SD (n = 3). \*\* $P < 0.01$ , \*\*\* $P < 0.001$ , \*\*\*\* $P < 0.0001$ .

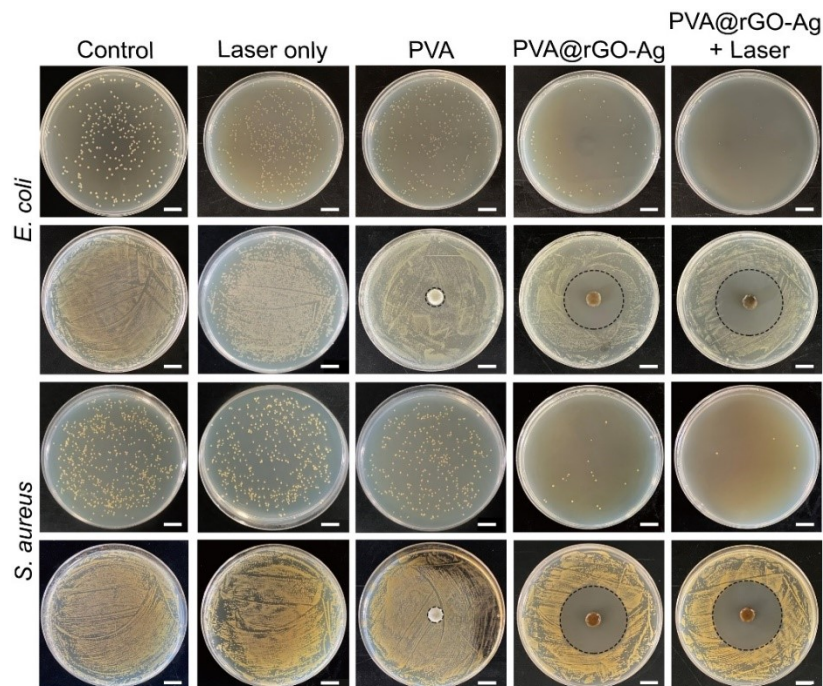

**Figure S13.** *E. coli* and *S. aureus* bacterial colonies and bacterial inhibition ring test for various treatments corresponding with Figure 3F. Scale bar = 1 cm.

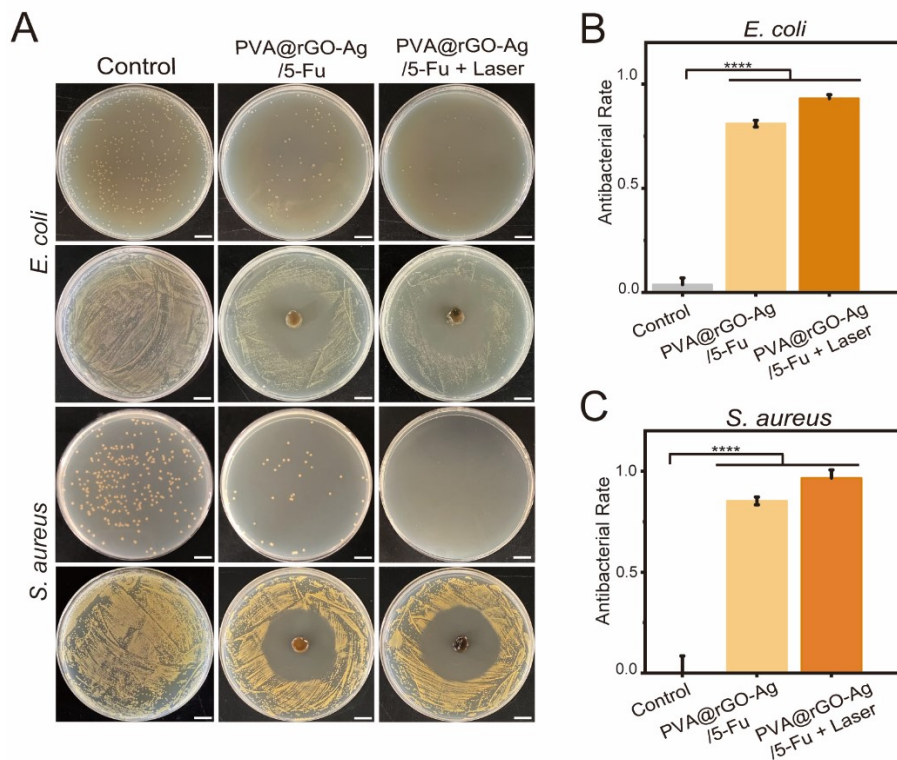

**Figure S14.** A) *E. coli* and *S. aureus* bacterial colonies and bacterial inhibition ring test for various treatments. B-C) Antibacterial rate of *S. aureus* (B) and *E. coli* (C) after different treatment. The NIR light was 808 nm and 2 W/cm<sup>2</sup> for 5 min. Data are means  $\pm$  SD (n = 3). \*\*\*\**P* < 0.0001.

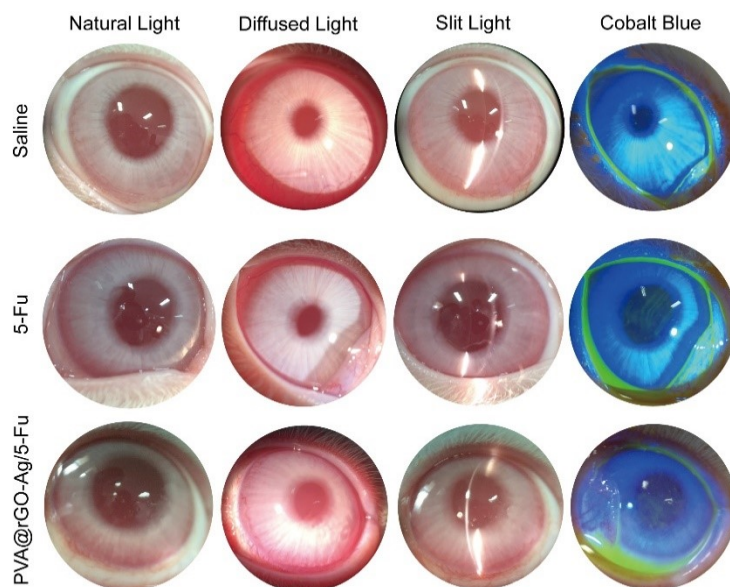

**Figure S15.** Anterior segment photographs of each group with various illuminations before the operation.

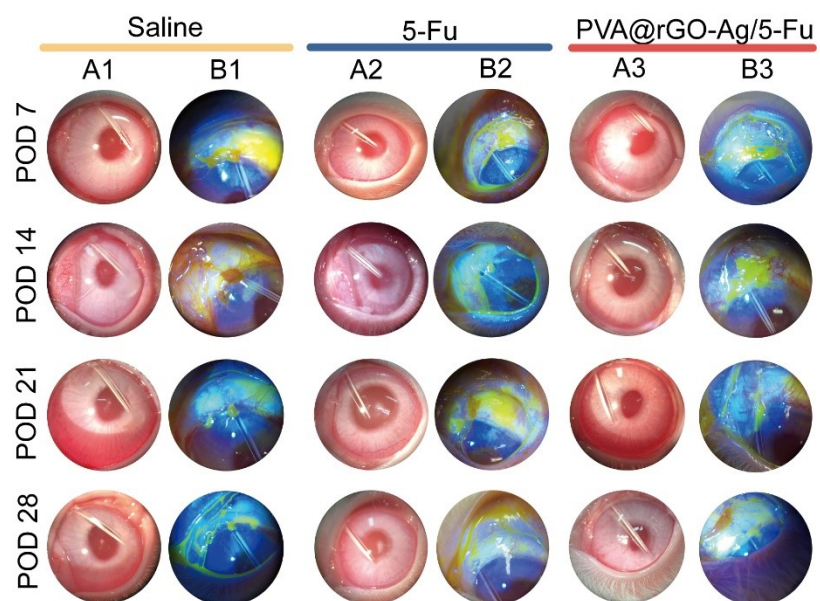

**Figure S16.** Anterior segment photographs of rabbit eyes during 28 days. (A1-A3) diffused illumination. (B1-B3)

Seidel test.

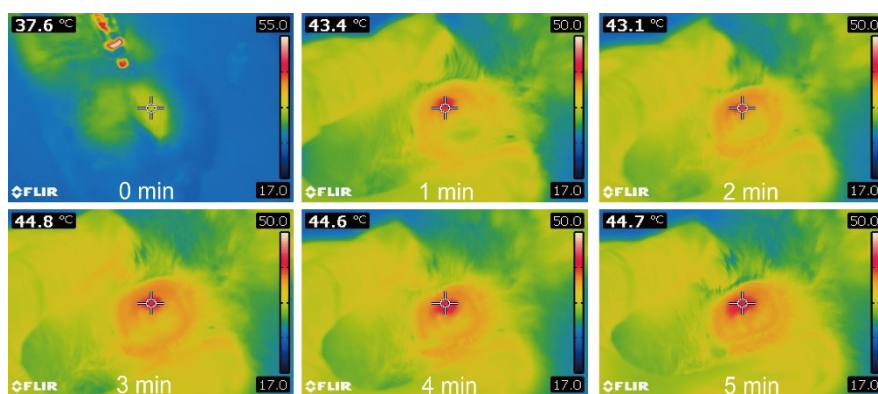

**Figure S17.** The thermal images of the PVA@rGO-Ag/5-Fu group after 808 nm NIR laser radiation (5 min, 2 W/cm<sup>2</sup>).



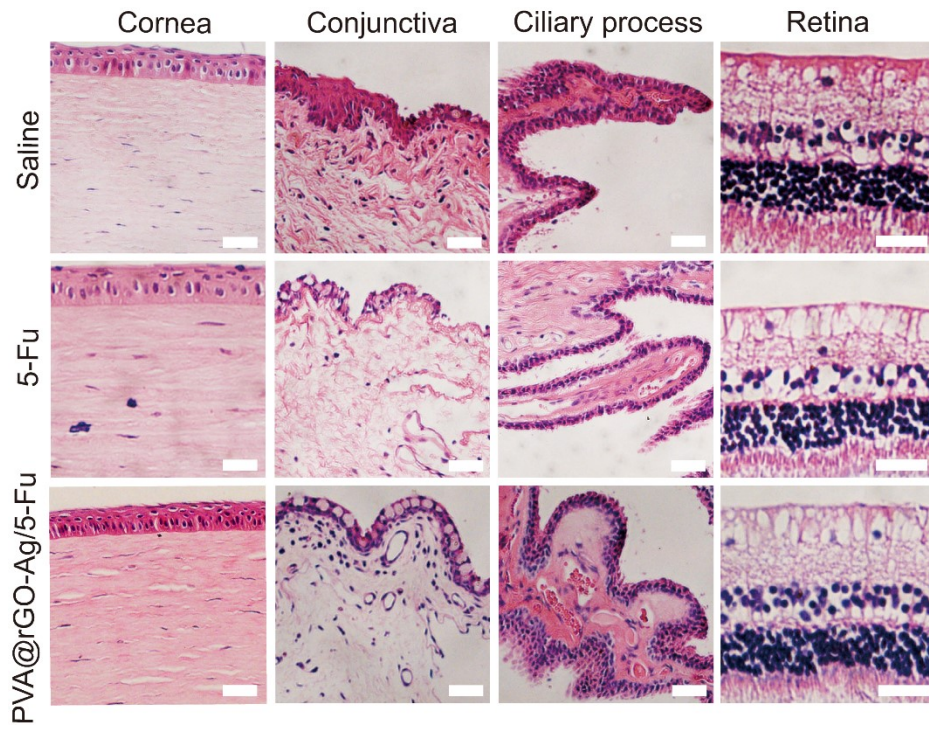

**Figure S18.** H&E staining of rabbit eyes after 28 days of the operation. Scale bar = 25  $\mu$ m.

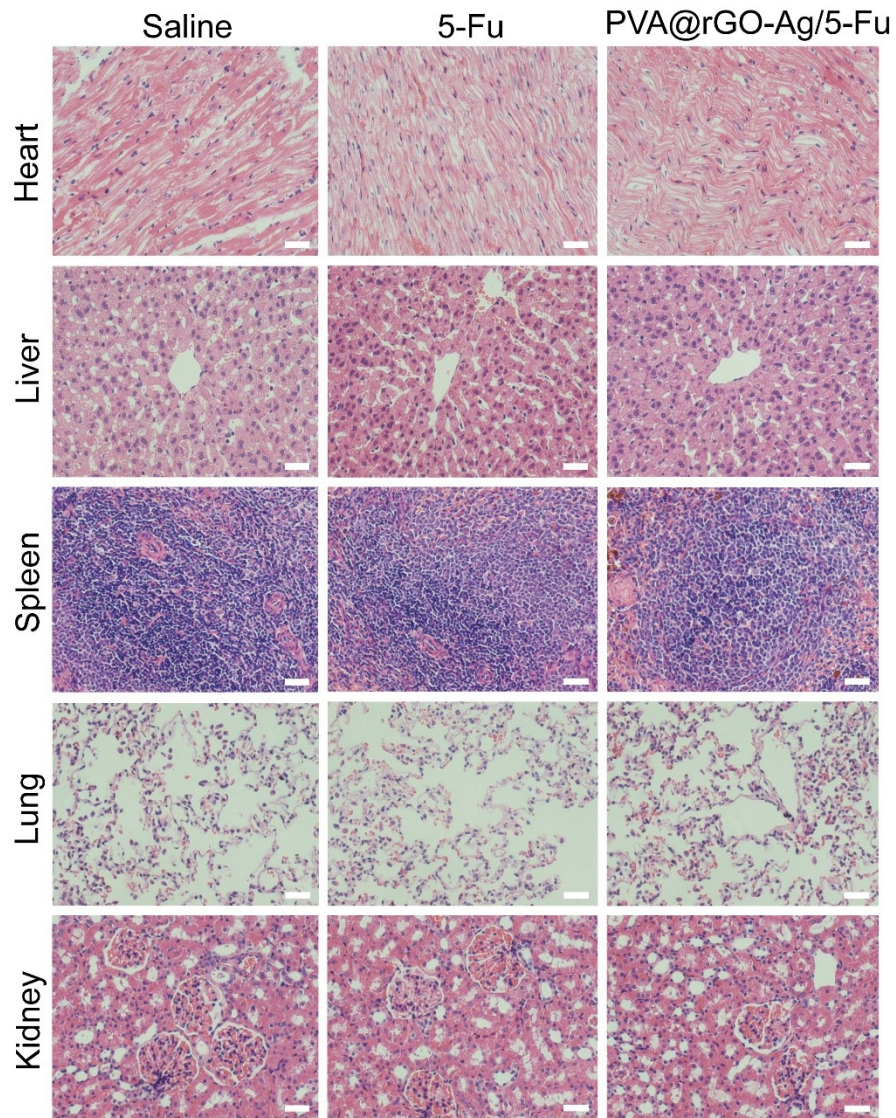

**Figure S19.** H&E staining of main organs excised from laboratory animals at the 28th day post-operation. Scale bar = 25  $\mu$ m.
